# Supplementary material for: Time and Cost Burden of Non-essential Tertiary Care Follow-up for Diabetes in Rural Patients: Implications for Decentralizing Diabetes Healthcare
Source: Research Square preprint supplement (doi:10.21203/rs.3.rs-8212044/v1), 2026-01-06
Supplement: Supplementary file 1 [file 4246ad417f9f165b5ab7b772.docx]

**Table 1:** Comparison of medians among P-K and P-NK by the Mann-Whitney U test

| Medians | P- K | P - NK | P Value |
| --- | --- | --- | --- |
| Age (years) | 58.0  Range (19 – 83) | 55.0  Range (19 – 87) | 0.30 |
| Average monthly family income (LKR) | 30,000  Range (3000 – 300,000) | 40,000  Range (2500 – 400,000) | 0.000 |
| Total both ways travel cost per clinic visit (LKR) | 120  Range (0 – 1200) | 230  Range (38 – 2400) | 0.000 |
| Percentage of monthly family income spent on clinic visit | 0.4  Range (0.0 – 10) | 0.6  Range (0.05 – 40) | 0.002 |
| Total both ways travel time for clinic visit (minutes) | 40.0  Range (10 – 180) | 90.0  Range (15 – 660) | 0.000 |

(P-K = Patients with diabetes who do not require tertiary care follow up for diabetes, but whose closest hospital from home is the national hospital Kandy, P-NK = Patients with diabetes who do not require tertiary care follow up for diabetes, and bypass a primary care local hospital closer to home to attend a tertiary care facility)
