# Supplementary material for: Time and Cost Burden of Non-essential Tertiary Care Follow-up for Diabetes in Rural Patients: Implications for Decentralizing Diabetes Healthcare
Source: Research Square preprint supplement (doi:10.21203/rs.3.rs-8212044/v1), 2026-01-06
Supplement: Supplementary file 2 [file 77d6c0871e923b76174d46c8.docx]

Table 5: Details of the 5 patients who bypassed a primary care local hospital close to home to attend tertiary care hospital (NK), whose predominant mode of transport to attend DEUK was by foot.

(NHK = National hospital Kandy)

| Patient number | Total duration for travel both ways from and home to NHK and back (minutes) | Other modes of transport used in addition to walking for the round trip | Closest hospital from home | Distance to closest hospital from home (km) | Total both ways travel time from home to closest local hospital (minutes) | Required tertiary care follow up for diabetes (T) or not (P) |
| --- | --- | --- | --- | --- | --- | --- |
| 1 | 195 | Walking- 120min Bus-75min | Divisional hospital Pamunuwa | 3 | 12 | P |
| 2 | 90 | Walking- 60min Bus-30min | Divisional hospital Yakghapitiya | 5 | 20 | P |
| 3 | 180 | Walking- 100min Bus-80min | Divisional hospital Bokkawala | 4 | 16 | P |
| 4 | 10 | Place of employment is near NHK, and walks from work place | Narampanawa | 1.5 | 6 | P |
| 5 | 30 | Place of employment is near NHK, and walks from work place | Madawala | 5 | 20 | T |
