# Supplementary material for: Time and Cost Burden of Non-essential Tertiary Care Follow-up for Diabetes in Rural Patients: Implications for Decentralizing Diabetes Healthcare
Source: Research Square preprint supplement (doi:10.21203/rs.3.rs-8212044/v1), 2026-01-06
Supplement: Supplementary file 3 [file 9ac1f28ec8a8179ea090f9c5.docx]

Table 2: Comparison of proportions among the two groups P-K and P-NK by the qi square test

| *Sex* | P-K | P-NK | Qi square (p value) |
| --- | --- | --- | --- |
| Male | 36.9% (n = 31) | 42% ( n = 66) | 0.439 |
| Female | 63.1% (n = 53) | 58% (n = 91) |
| *Level of Education* |  |  |  |
| Primary education: Ordinary level or below completed at school | 80.9% (N = 72) | 61.8% (N = 94) | 0.002 |
| Higher education: Advance level at school or bachelor’s degree completed | 19.1% (N =17) | 38.2% (N = 58) |
| *Income category (LKR)* |  |  | 0.195 |
| </= 20,000 | 25.9% (n = 22) | 18.8% (n = 27) |
| 20,001 - 50,000 | 52.9% (n = 45) | 47.2% (n = 68) |
| 50,001 - 100,000 | 14.1% (n = 12) | 25.7% (n = 37) |
| 100,001 - 200,000 | 4.7% (n = 4) | 4.9% (n = 7) |
| >200,000 | 2.4% (n = 2) | 3.4% (n = 5) |
| *Broad income categories ( LKR)* |  |  |  |
| > 100,000 | 92.9% ( n = 79) | 91.7% ( n = 132) | 0.729 |
| < 100,000 | 7.1% ( n = 6 ) | 8.3% ( n = 12) |
| *Mode of transport* |  |  | 0.000 |
| Foot | 12.4% (n = 11) | 2.6% (n = 4) |
| Bus | 69.7% (n = 62) | 78.9% (n =120) |
| Train | 1.1% (n = 1) | 0.0% (n = 0) |
| Hired vehicle | 6.7% (n = 6) | 3.9% (n = 6) |
| Three wheeler | 9.0% (n = 8) | 13.3% (n = 20) |
| Own vehicle | 1.1% (n = 1) | 1.3% (n = 2) |
| *Time taken to travel (minutes)* |  |  | 0.070 |
| </=30 | 34.1% (n = 30) | 9.2% (n = 14) |
| 31 - 60 | 51.1% (n = 45) | 24.3% (n = 37) |
| 61 - 120 | 13.7% (n = 12) | 45.4% (n = 69) |
| >120 | 1.1% (n = 1) | 21.1% (n =32) |
| *Employment Status of patient* |  |  | 0.402 |
| Yes | 25.85% (n = 23) | 30.9% ( n = 47) |
| No | 74.2% (n = 66) | 69.1% (n= 105) |
| *Leave Type required patient* |  |  | 0.393 |
| Full day leave | 47.8% (n = 11) | 42.6% (n = 20) |
| Half day leave | 0.0% (n = 0) | 10.6% (n = 5) |
| Short leave | 0.0% (n = 0) | 4.3% (n = 2) |
| No leave taken | 26.1% (n = 6) | 25.5% (n = 12) |
| Self employed | 26.1% (n = 6) | 17.0% (n = 8) |
| *Another activity in Kandy* |  |  | 0.764 |
| Yes | 21.3% (n = 19) | 19.7% (n = 30) |
| No | 78.7% (n = 70) | 80.3% (n =122) |
| *Over night stay required* |  |  | 0.179 |
| Yes | 0% (n = 0) | 1.3% (n = 2) |
| No | 100% (n = 89) | 98.7% (n = 148) |
| *Accompanying person required* |  |  | 0.887 |
| Yes | 28.1% (n = 25) | 28.9% (n = 44) |
| *No* | 71.9% (n = 64) | 71.1% (n =108) |
| *Employment status of accompany person* |  |  | 0.811 |
| Yes | 20% (n = 5) | 25% (n = 11) |
| No | 80% (n = 20) | 75% (n = 33) |
| *Leave type required for accompany person* |  |  | 0.770 |
| Full day leave | 60.0% (n = 3) | 36.4% (n = 4) |
| Half day leave | 0% (n= 0) | 18.2% (n = 2) |
| Short leave | 0% (n = 0) | 9.0% (n = 1) |
| No leave taken | 20.0% (n = 1) | 18.2% (n = 2) |
| Self employed | 20.0% (n = 1) | 18.2% (n =2) |

(P-K = Patients with diabetes who do not require tertiary care follow up for diabetes, but whose closest hospital from home is the national hospital Kandy, P-NK = Patients with diabetes who do not require tertiary care follow up for diabetes, and bypass a primary care local hospital closer to home to attend a tertiary care facility)
