# Supplementary material for: Time and Cost Burden of Non-essential Tertiary Care Follow-up for Diabetes in Rural Patients: Implications for Decentralizing Diabetes Healthcare
Source: Research Square preprint supplement (doi:10.21203/rs.3.rs-8212044/v1), 2026-01-06
Supplement: Supplementary file 4 [file c45a9fce8c495bef42dcb545.docx]

|  | Home address | Time taken to travel (minutes) | Cost for travel (LKR) | Monthly family income (LKR) | Percentage of monthly family income spent on travel for clinic visit | Distance to nearest hospital | Nearest hospital |
| --- | --- | --- | --- | --- | --- | --- | --- |
| Patient 1 | Kekirawa | 300  (5 hours) | 880 | 5000 | 17.6% | 2 km | Kekirawa hospital |
| Patient 2- | Udagama | 360  (6 hours) | 405 | 50,000 | 0.81 | 11.2 km | Ududumbara hospital |

Table 3: Details of time and cost expenditure of the two patients who required overnight stay associated with attending the clinic visit.

They both did not require tertiary care follow up for diabetes and bypassed a primary care local hospital close to home to attend a tertiary care hospital (P-NK)
