# Supplementary material for: Time and Cost Burden of Non-essential Tertiary Care Follow-up for Diabetes in Rural Patients: Implications for Decentralizing Diabetes Healthcare
Source: Research Square preprint supplement (doi:10.21203/rs.3.rs-8212044/v1), 2026-01-06
Supplement: Supplementary file 5 [file d75b6f5c52433c185c4082ee.docx]

Table 4: Details of those who spent 10% or more of their monthly family income on the cost for attending the clinic visit but did not require tertiary care follow up for diabetes.

(P-K = Patients with diabetes who do not require tertiary care follow up for diabetes, but whose closest hospital from home is the national hospital Kandy, P-NK = Patients with diabetes who do not require tertiary care follow up for diabetes, and bypass a primary care local hospital closer to home to attend a tertiary care facility)

| Patient number | Weather closes hospital Kandy (K) or another primary care hospital (NK) | Percentage of monthly income spent on travel for clinic visit | Monthly family income (LKR) | Cost for travel for clinic visit |
| --- | --- | --- | --- | --- |
| 1 | P-K | 10 % | 10,000 | 1000 |
| 2 | P-NK | 10.5 % | 8000 | 840 |
| 3 | P-NK | 14.29 % | 7000 | 1000 |
| 4 | P-NK | 17.6 % | 5000 | 880 |
| 5 | P-NK | 30 % | 7000 | 2100 |
| 6 | P-NK | 40 % | 2500 | 1000 |
